# Supplementary material for: Heavy metal leaching from stormwater control measures – insights into field and lab prestressed media and road-deposited sediments
Source: Royal Society of Chemistry journal article supplement (doi:10.1039/d4ew00388h), 2024-10-30
Supplement: d4ew00388h1.pdf [file d4ew00388h1.pdf]

12 **Tables:**

13 **Table S1.** Conditions and heavy metal retention of the filter media in the lab scale prestressing  
 14 procedure.

| SCM         | Catch-<br>ment area | Full-scale<br>filter<br>surface | Model<br>Scale<br>Factor | Influent<br>Volume | pH <sub>effluent</sub> | Zn<br>retention | Cu<br>retention |
|-------------|---------------------|---------------------------------|--------------------------|--------------------|------------------------|-----------------|-----------------|
| <b>Unit</b> | m <sup>2</sup>      | m <sup>2</sup>                  | -                        | L                  | -                      | %               | %               |
| S           | 830 <sup>a</sup>    | 0.41 <sup>a</sup>               | 1:82                     | 117.4              | 7.4                    | 91.7            | >97.3           |
| D           | 165                 | 1.55                            | 1:55                     | 35                 | 8.3                    | >99.3           | >97.3           |
| V           | 473                 | 0.63                            | 1:80                     | 68.6               | 9.9                    | 95.5            | >97.6           |

15 <sup>a</sup> connected catchment and filter surface area per installed filter cartridges

16

17 **Table S2.** Conditions and heavy metal retention of the filter media in the lab scale prestressing  
 18 procedure.

| Eluent     | Chemical                              | Molecular weight | Concentration                 |
|------------|---------------------------------------|------------------|-------------------------------|
|            |                                       | [g/mol]          | [mg/L]                        |
| SRR        | ZnSO <sub>4</sub> · 7H <sub>2</sub> O | 287.5            | 0.44 <sup>a</sup> (0.050 Cu)  |
|            | CuSO <sub>4</sub> · 5H <sub>2</sub> O | 249.7            | 0.196 <sup>a</sup> (0.100 Zn) |
|            | MgSO <sub>4</sub> · 7H <sub>2</sub> O | 246.5            | 55.0 <sup>a</sup>             |
|            | KCl                                   | 74.6             | 25.0 <sup>a</sup>             |
|            | KNO <sub>3</sub>                      | 101.1            | 90.0 <sup>a</sup>             |
|            | NaNO <sub>3</sub>                     | 85.0             | 90.0 <sup>a</sup>             |
|            | CaCl <sub>2</sub>                     | 111              | 200 <sup>a</sup>              |
|            | NaHCO <sub>3</sub>                    | 84.0             | 97.3 <sup>b</sup>             |
| SRR + NaCl | Identical as SRR                      |                  |                               |
|            | NaCl                                  | 58.4             | 10,000 <sup>c</sup>           |

19 <sup>a</sup> (Barrett et al., 2014)

20 <sup>b</sup> (Rommel et al., 2020)

21 <sup>c</sup> (Huber et al., 2016)

22 **Table S3.** Heavy metal contents (pseudo-total after Aqua Regia Digestion) and chemical properties of the blank filter  
 23 media; heavy metal contents and loss on ignition (LOI) refer to dry matter; sampling S field blank was not possible;  
 24 data published previously in Rommel et al. (2021).

| Parameter     | Cr               | Cu               | Ni               | Pb               | Zn    | LOI  |
|---------------|------------------|------------------|------------------|------------------|-------|------|
| Unit          | mg/kg            | mg/kg            | mg/kg            | mg/kg            | mg/kg | %    |
| D Field Blank | 2.5 <sup>a</sup> | 2.5 <sup>a</sup> | 1.0 <sup>a</sup> | 81.0             | 43.3  | 0.5  |
| D Lab Blank   | 13.7             | 2.5 <sup>a</sup> | 10.0             | 5.0 <sup>a</sup> | 13.7  | 0.4  |
| S Lab Blank   | 2.5 <sup>a</sup> | 2.5 <sup>a</sup> | 36.4             | 5.0 <sup>a</sup> | 53.6  | 56.3 |
| V Field Blank | 12.2             | 2.5 <sup>a</sup> | 5.2              | 5.0 <sup>a</sup> | 17.5  | 5.9  |
| V Lab Blank   | 2.5 <sup>a</sup> | 2.5 <sup>a</sup> | 3.9              | 45.5             | 34.9  | 5.7  |

25 <sup>a</sup> Value below LOQ, substituted by 0.5 · LOQ.

26 **Table S4.** Raw data of the quiescent column leaching test. FM = Filter Media; FC = Filter Cake.

| SCM  | Pre-stressing | Material | Eluent | Timestep | pH   | EC     | DOC   | Cu    | Ni | Zn    |
|------|---------------|----------|--------|----------|------|--------|-------|-------|----|-------|
| Unit |               |          |        | h        | -    | µs/cm  |       | mg/L  |    |       |
| D    | Lab           | FM       | 4      | SRR      | 7.87 | 874    | 0.901 | <0.01 |    | 0.136 |
| D    | Lab           | FM       | 4      | SRR      | 8.04 | 862    | 1.32  | 0.014 |    | 0.144 |
| D    | Lab           | FM       | 48     | SRR      | 7.96 | 882    | 0.828 | 0.013 |    | 0.185 |
| D    | Lab           | FM       | 48     | SRR      | 7.96 | 851    | 0.568 | 0.012 |    | 0.223 |
| D    | Lab           | FM       | 168    | SRR      | 8.02 | 885    | 1.29  | 0.016 |    | 0.227 |
| D    | Lab           | FM       | 168    | SRR      | 8.06 | 885    | 0.534 | 0.015 |    | 0.215 |
| D    | Lab           | FM       | 4      | SRR_NaCl | 8.14 | 18,440 | 0.783 | 0.010 |    | 0.271 |
| D    | Lab           | FM       | 4      | SRR_NaCl | 8.2  | 18,470 | 0.798 | 0.011 |    | 0.365 |
| D    | Lab           | FM       | 48     | SRR_NaCl | 8.11 | 18,570 | 1.29  | <0.01 |    | 0.399 |
| D    | Lab           | FM       | 48     | SRR_NaCl | 8.22 | 18,470 | 0.873 | 0.011 |    | 0.324 |
| D    | Lab           | FM       | 168    | SRR_NaCl | 8.19 | 18,350 | 1.29  | 0.010 |    | 0.339 |
| D    | Lab           | FM       | 168    | SRR_NaCl | 8.18 | 18,390 | 1.39  | 0.010 |    | 0.288 |
| V    | Lab           | FM       | 4      | SRR      | 8.37 | 841    | 2.78  | 0.011 |    | 0.016 |
| V    | Lab           | FM       | 4      | SRR      | 8.34 | 840    | 1.95  | 0.012 |    | 0.011 |

|   |       |    |     |          |      |        |       |       |       |       |
|---|-------|----|-----|----------|------|--------|-------|-------|-------|-------|
| V | Lab   | FM | 48  | SRR      | 8.23 | 847    | 1.94  | <0.01 | 0.009 |       |
| V | Lab   | FM | 48  | SRR      | 8.35 | 850    | 2.32  | <0.01 | 0.007 |       |
| V | Lab   | FM | 168 | SRR      | 8.36 | 848    | 1.88  | <0.01 | 0.009 |       |
| V | Lab   | FM | 168 | SRR      | 8.29 | 850    | 2.1   | <0.01 | 0.007 |       |
| V | Lab   | FM | 4   | SRR_NaCl | 6.9  | 18,100 | 0.999 | 0.011 | 1.708 |       |
| V | Lab   | FM | 4   | SRR_NaCl | 6.9  | 17,300 | 0.89  | 0.014 | 1.335 |       |
| V | Lab   | FM | 48  | SRR_NaCl | 6    | 16,900 | 1.17  | 0.064 | 2.451 |       |
| V | Lab   | FM | 48  | SRR_NaCl | 6.3  | 17,140 | 0.751 | 0.013 | 2.168 |       |
| V | Lab   | FM | 168 | SRR_NaCl | 6.5  | 17,310 | 0.728 | 0.008 | 2.704 |       |
| V | Lab   | FM | 168 | SRR_NaCl | 6.8  | 17,800 | 0.796 | 0.009 | 2.361 |       |
| S | Lab   | FM | 4   | SRR      | 8.18 | 1,086  | 4.98  | 0.030 | 0.040 |       |
| S | Lab   | FM | 4   | SRR      | 8.28 | 1,077  | 4.9   | 0.029 | 0.029 |       |
| S | Lab   | FM | 48  | SRR      | 8.2  | 1,093  | 1.56  | 0.028 | 0.025 |       |
| S | Lab   | FM | 48  | SRR      | 8.27 | 1,062  | 1.5   | 0.027 | 0.015 |       |
| S | Lab   | FM | 168 | SRR      | 8.27 | 1,077  | 1.62  | 0.027 | 0.017 |       |
| S | Lab   | FM | 168 | SRR      | 8.24 | 1,076  | 1.32  | 0.027 | 0.017 |       |
| S | Lab   | FM | 4   | SRR_NaCl | 7.79 | 17,300 | 6.82  | 0.012 | 0.182 |       |
| S | Lab   | FM | 4   | SRR_NaCl | 7.87 | 17,730 | 5.58  | 0.017 | 0.185 |       |
| S | Lab   | FM | 48  | SRR_NaCl | 8.12 | 17,620 | 2.83  | 0.012 | 0.077 |       |
| S | Lab   | FM | 48  | SRR_NaCl | 8.14 | 17,470 | 2.09  | 0.014 | 0.076 |       |
| S | Lab   | FM | 168 | SRR_NaCl | 7.99 | 17,190 | 1.69  | 0.011 | 0.067 |       |
| S | Lab   | FM | 168 | SRR_NaCl | 8.07 | 17,550 | 1.69  | 0.011 | 0.057 |       |
| D | Field | FM | 4   | SRR      | 7.88 | 1,387  | 21.3  | 0.059 | <0.01 | 0.088 |
| D | Field | FM | 4   | SRR      | 7.87 | 1,333  | 18.7  | 0.044 | <0.01 | 0.066 |
| D | Field | FM | 48  | SRR      | 7.85 | 1,460  | 23.3  | 0.041 | <0.01 | 0.108 |
| D | Field | FM | 48  | SRR      | 7.82 | 1,417  | 22    | 0.057 | <0.01 | 0.133 |
| D | Field | FM | 168 | SRR      | 7.69 | 1,346  | 19.1  | 0.053 | <0.01 | 0.132 |
| D | Field | FM | 168 | SRR      | 7.71 | 1,426  | 22.5  | 0.040 | <0.01 | 0.099 |
| D | Field | FM | 4   | SRR_NaCl | 7.83 | 18,710 | 22    | 0.071 | 0.016 | 0.211 |
| D | Field | FM | 4   | SRR_NaCl | 7.84 | 18,720 | 22.7  | 0.074 | 0.017 | 0.208 |

|   |       |    |     |          |      |        |      |       |       |       |
|---|-------|----|-----|----------|------|--------|------|-------|-------|-------|
| D | Field | FM | 48  | SRR_NaCl | 7.83 | 18,730 | 22   | 0.039 | 0.011 | 0.169 |
| D | Field | FM | 48  | SRR_NaCl | 7.89 | 18,750 | 22.1 | 0.063 | 0.016 | 0.244 |
| D | Field | FM | 168 | SRR_NaCl | 7.7  | 18,700 | 21.9 | 0.063 | 0.016 | 0.283 |
| D | Field | FM | 168 | SRR_NaCl | 7.65 | 18,710 | 24.6 | 0.072 | 0.019 | 0.352 |
| V | Field | FM | 4   | SRR      | 7.98 | 1,403  | 25   | 0.043 | <0.01 | 0.012 |
| V | Field | FM | 4   | SRR      | 7.98 | 1,355  | 22.2 | 0.037 | <0.01 | 0.009 |
| V | Field | FM | 48  | SRR      | 8.01 | 1,399  | 24.2 | 0.038 | <0.01 | 0.017 |
| V | Field | FM | 48  | SRR      | 8.02 | 1,386  | 22.7 | 0.029 | <0.01 | 0.012 |
| V | Field | FM | 168 | SRR      | 7.93 | 1,552  | 27.8 | 0.061 | <0.01 | 0.044 |
| V | Field | FM | 168 | SRR      | 7.97 | 1,484  | 25.5 | 0.050 | <0.01 | 0.033 |
| V | Field | FM | 4   | SRR_NaCl | 7.63 | 18,500 | 22.5 | 0.094 | 0.073 | 0.277 |
| V | Field | FM | 4   | SRR_NaCl | 7.6  | 18,480 | 7.25 | 0.026 | 0.020 | 0.068 |
| V | Field | FM | 48  | SRR_NaCl | 7.62 | 18,550 | 13   | 0.042 | 0.050 | 0.293 |
| V | Field | FM | 48  | SRR_NaCl | 7.55 | 18,450 | 18.2 | 0.058 | 0.066 | 0.283 |
| V | Field | FM | 168 | SRR_NaCl | 7.48 | 18,500 | 16.2 | 0.049 | 0.068 | 0.336 |
| V | Field | FM | 168 | SRR_NaCl | 7.41 | 18,580 | 16.2 | 0.048 | 0.069 | 0.334 |
| S | Field | FM | 4   | SRR      | 8.06 | 1,222  | 4.92 | <0.01 | <0.01 | 0.012 |
| S | Field | FM | 4   | SRR      | 8.01 | 1,342  | 13.1 | 0.018 | <0.01 | 0.008 |
| S | Field | FM | 48  | SRR      | 8.04 | 1,445  | 8.93 | 0.018 | <0.01 | 0.007 |
| S | Field | FM | 48  | SRR      | 8.03 | 1,242  | 7.04 | 0.015 | <0.01 | 0.005 |
| S | Field | FM | 168 | SRR      | 7.97 | 1,304  | 5.51 | 0.016 | <0.01 | 0.009 |
| S | Field | FM | 168 | SRR      | 8.04 | 1,257  | 2.19 | <0.01 | <0.01 | <0.02 |
| S | Field | FM | 4   | SRR_NaCl | 7.93 | 17,510 | 10.6 | 0.011 | 0.026 | 0.012 |
| S | Field | FM | 4   | SRR_NaCl | 7.82 | 17,450 | 7.71 | <0.01 | 0.020 | 0.029 |
| S | Field | FM | 48  | SRR_NaCl | 7.86 | 17,270 | 3.69 | <0.01 | 0.015 | 0.030 |
| S | Field | FM | 48  | SRR_NaCl | 7.84 | 17,430 | 17.6 | 0.012 | 0.028 | 0.042 |
| S | Field | FM | 168 | SRR_NaCl | 7.84 | 17,060 | 7.41 | 0.013 | 0.027 | 0.040 |
| S | Field | FM | 168 | SRR_NaCl | 7.85 | 17,760 | 5.92 | 0.011 | 0.030 | 0.036 |
| D | Field | FC | 4   | SRR      | 7.77 | 2,540  | 83.4 | 0.275 | 0.023 | 0.487 |
| D | Field | FC | 4   | SRR      | 7.7  | 2,510  | 79.6 | 0.266 | 0.022 | 0.490 |

|   |       |    |     |          |      |        |      |       |       |       |
|---|-------|----|-----|----------|------|--------|------|-------|-------|-------|
| D | Field | FC | 48  | SRR      | 7.74 | 2,600  | 95.1 | 0.195 | 0.023 | 0.552 |
| D | Field | FC | 48  | SRR      | 7.7  | 2,620  | 94.8 | 0.200 | 0.023 | 0.525 |
| D | Field | FC | 168 | SRR      | 7.99 | 2,420  | 85.7 | 0.170 | 0.021 | 0.359 |
| D | Field | FC | 168 | SRR      | 7.84 | 2,370  | 84   | 0.107 | 0.014 | 0.257 |
| D | Field | FC | 4   | SRR_NaCl | 7.54 | 19,270 | 94.5 | 0.306 | 0.048 | 0.973 |
| D | Field | FC | 4   | SRR_NaCl | 7.55 | 20,100 | 109  | 0.330 | 0.055 | 1.130 |
| D | Field | FC | 48  | SRR_NaCl | 7.55 | 19,680 | 107  | 0.232 | 0.055 | 1.285 |
| D | Field | FC | 48  | SRR_NaCl | 7.52 | 19,670 | 104  | 0.227 | 0.053 | 1.277 |
| D | Field | FC | 168 | SRR_NaCl | 7.71 | 19,440 | 106  | 0.203 | 0.046 | 0.946 |
| D | Field | FC | 168 | SRR_NaCl | 7.6  | 19,470 | 105  | 0.201 | 0.048 | 0.996 |

27

28 **Table S5.** Raw data of shaken batch extraction test (DIN 19529). FM = Filter Media; FC = Filter Cake.

| <b>SCM</b>  | <b>Pre-stressing</b> | <b>Material</b> | <b>Eluent</b> | <b>Timestep</b> | <b>pH</b> | <b>EC</b>    | <b>DOC</b> | <b>Cu</b>   | <b>Ni</b> | <b>Zn</b> |
|-------------|----------------------|-----------------|---------------|-----------------|-----------|--------------|------------|-------------|-----------|-----------|
| <b>Unit</b> |                      |                 |               | <b>h</b>        | <b>-</b>  | <b>µs/cm</b> |            | <b>mg/L</b> |           |           |
| D           | Lab                  | FM              | 24            | SRR             | 8.02      | 980          | 1.21       | 0.016       |           | 0.252     |
| D           | Lab                  | FM              | 24            | SRR             | 8.07      | 970          | 0.9        | 0.016       |           | 0.271     |
| D           | Lab                  | FM              | 24            | SRR_NaCl        | 8.13      | 18,290       | 0.99       | <0.01       |           | 0.276     |
| D           | Lab                  | FM              | 24            | SRR_NaCl        | 8.03      | 18,260       | 1.02       | <0.01       |           | 0.289     |
| D           | Lab                  | FM              | 24            | DI              | 8.41      | 259          | 0.9        | <0.01       |           | 0.030     |
| D           | Lab                  | FM              | 24            | DI              | 8.53      | 267          | 1.21       | <0.01       |           | 0.024     |
| D           | Field                | FM              | 24            | SRR             | 7.84      | 1,393        | 33.2       | 0.119       | 0.010     | 0.109     |
| D           | Field                | FM              | 24            | SRR             | 7.82      | 1,385        | 33.5       | 0.120       | 0.010     | 0.100     |
| D           | Field                | FM              | 24            | SRR_NaCl        | 7.73      | 18,890       | 41         | 0.139       | 0.018     | 0.242     |
| D           | Field                | FM              | 24            | SRR_NaCl        | 7.71      | 18,690       | 40.9       | 0.143       | 0.017     | 0.257     |
| D           | Field                | FM              | 24            | DI              | 8.05      | 648          | 36.8       | 0.137       | <0.01     | 0.071     |
| D           | Field                | FM              | 24            | DI              | 7.91      | 690          | 43.8       | 0.139       | <0.01     | 0.080     |

29

### 30 Sequential extraction procedure - method:

31 The three-step optimized BCR® SEP (Rauret et al., 1999) was used to identify the mobile fraction.  
32 80 mL PP centrifuge tubes (Herolab GmbH, Germany) were used for the extraction, and further  
33 laboratory-ware was made of borosilicate glass, polypropylene (PP), or Polytetrafluoroethylene  
34 (PTFE), as required. The labware was cleaned with 4 mol/L HNO<sub>3</sub> and agitated for minimum 16  
35 h in an end-over-end shaker. The reagents were mixed according to Rauret et al. (1999). The  
36 centrifuge tubes were filled with  $1 \pm 0.03$  g of sample and filled with either 40 mL in Step 1/2 or  
37 50 mL in Step 3 with the reagent solution. The reagent solution was 0.11 mol L<sup>-1</sup> acetic acid in  
38 Step 1, 0.5 mol L<sup>-1</sup> hydroxylamine hydrochloride for Step 2, and 1.0 mol L<sup>-1</sup> ammonium acetate  
39 in Step 3. Subsequently, the samples were shaken for 16 h in a mechanical end-over-end shaker  
40 with a speed of  $30 \pm 5$  rpm at a room temperature of  $22 \pm 3$ °C. Step 3 differs from the other steps  
41 by its hydrogen peroxide digestion with 20 mL H<sub>2</sub>O<sub>2</sub> in a water bath at  $85 \pm 2$  °C before adding  
42 the reagent and shaking. After the 16 h shaking, the solids were separated from the supernatant by  
43 centrifugation for 20 min at 3000 g. After the first and second extraction steps, the residues were  
44 washed with 20 mL ultrapure water and shaken. The supernatant was discarded after separation  
45 by centrifugation, as described before. An additional aqua regia digestion of the solid residual  
46 evaluated the residual fraction.

### 47 Figures:

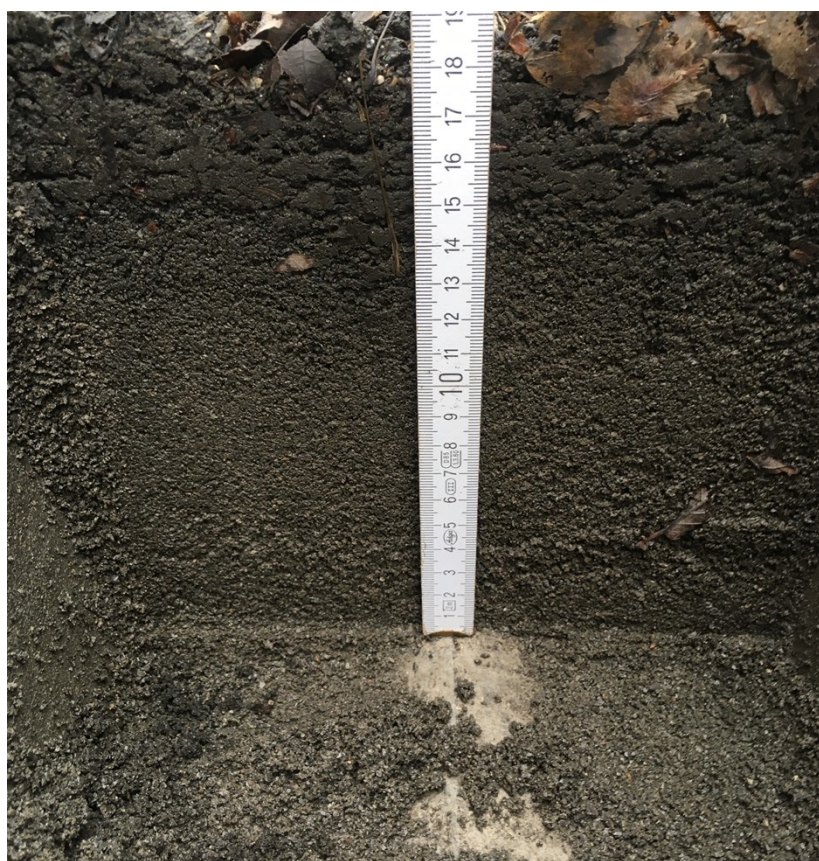

Figure S1: Vertical profile of the filter substratum channel of SCM-D with the sorptive filter media

(carbonate sand, 0-15 cm) and the accumulated filter cake (ca. 15-19 cm)

48

49

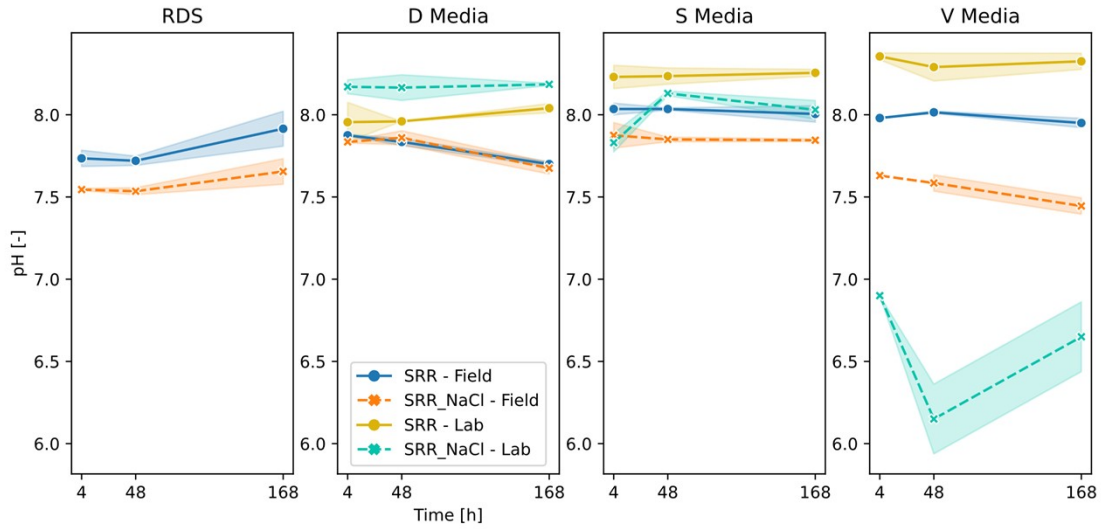

Figure S2: Time series of the mean pH values in the leachates of the tested media; standard deviation is represented by the shaded area

50

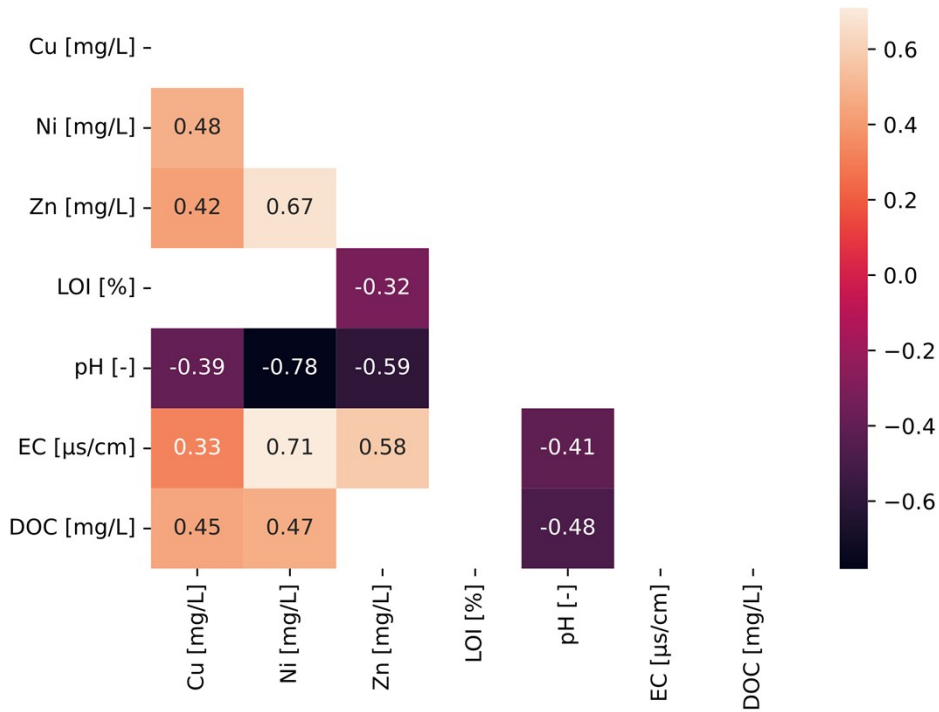

Figure S3: Correlation matrix with Spearman's correlation coefficient for seven parameters displayed



are significant ( $p < 0.05$ ) correlation coefficients higher than  $\pm 0.3$ .

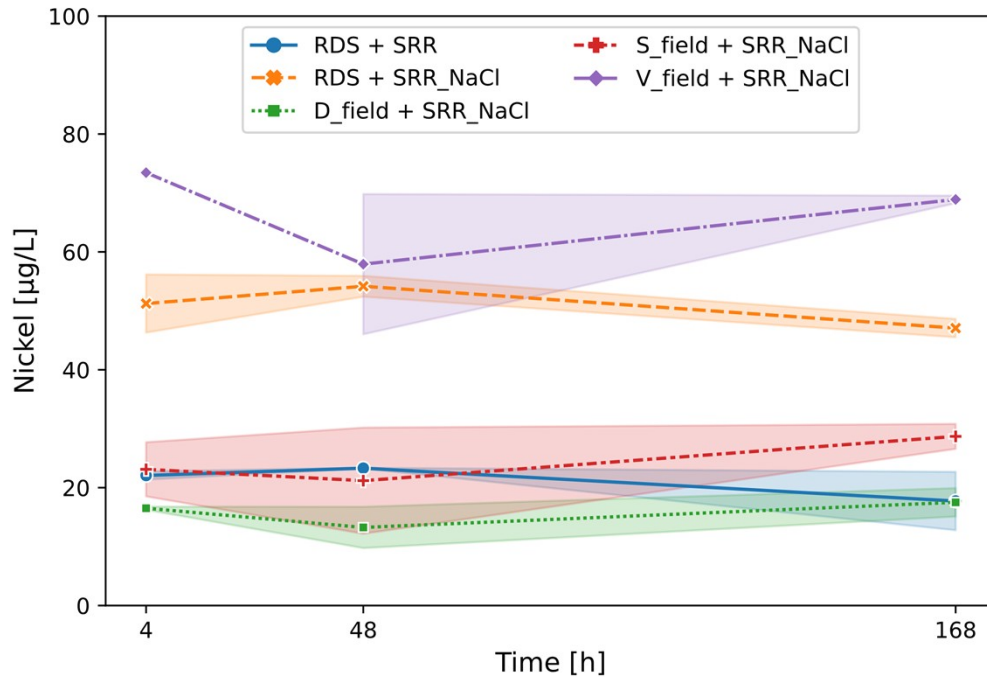

Figure S4: Time series of the mean dissolved Ni concentrations in the leachates of the field filter media; standard deviation is represented by the shaded area

51

## 52 Literatur:

- 53 Barrett, M., Katz, L., Taylor, S., Sansalone, J., Stevenson, M., 2014. Measuring and Removing  
54 Dissolved Metals from Stormwater in Highly Urbanized Areas. Transportation Research  
55 Board, Washington, D.C. <https://doi.org/10.17226/22389>
- 56 Huber, M., Hilbig, H., Badenberg, S.C., Fassnacht, J., Drewes, J.E., Helmreich, B., 2016. Heavy  
57 metal removal mechanisms of sorptive filter materials for road runoff treatment and  
58 remobilization under de-icing salt applications. *Water Research* 102, 453–463.  
59 <https://doi.org/10.1016/j.watres.2016.06.063>
- 60 Rauret, G., López-Sánchez, J.F., Sahuquillo, A., Rubio, R., Davidson, C., Ure, A., Quevauviller,  
61 P., 1999. Improvement of the BCR three step sequential extraction procedure prior to the  
62 certification of new sediment and soil reference materials. *Journal of Environmental*  
63 *Monitoring* 1, 57–61. <https://doi.org/10.1039/A807854H>
- 64 Rommel, S.H., Noceti, L., Stinshoff, P., Helmreich, B., 2020. Leaching potential of heavy metals  
65 from road-deposited sediment and sorptive media during dry periods in storm water quality  
66 improvement devices. *Environ. Sci.: Water Res. Technol.* 6, 1890–1901.  
67 <https://doi.org/10.1039/D0EW00351D>
- 68 Rommel, S.H., Stinshoff, P., Helmreich, B., 2021. Sequential extraction of heavy metals from  
69 sorptive filter media and sediments trapped in stormwater quality improvement devices for

70 road runoff. Science of the Total Environment 12.  
71 <https://doi.org/10.1016/j.scitotenv.2021.146875>  
72
